# Supplementary material for: Overexpression of Chicken IRF7 Increased Viral Replication and Programmed Cell Death to the Avian Influenza Virus Infection Through TGF-Beta/FoxO Signaling Axis in DF-1
Source: Front Genet. 2018 Sep 25;9:415. doi: 10.3389/fgene.2018.00415 (PMC6190866; doi:10.3389/fgene.2018.00415)
Supplement: Supplementary file 1 [file Table_1.XLSX]

## Sheet: WTvsOE
Supplementary Table S1. Differentially expressed genes between Control and CuO-IRF7 cells. (NS: Not significant)
Entrez gene id	Gene name	Log2FC
		Mock	H6N2
373889	HK1	-0.322667	-0.539066
373890	ADRA1B	1.59927	1.66888
373892	ADD3	-0.783328	-0.603924
373898	PALD1	NS	-0.476132
373899	PDIA3	NS	0.334954
373903	DIO2	-0.882802	NS
373904	TNFRSF10B	NS	-0.442367
373905	BASP1	NS	0.468486
373906	NRG1	-1.62587	-1.39286
373907	AHR	-0.505326	NS
373908	EDNRA	-0.61432	NS
373909	EDNRB2	-1.50358	-0.936077
373920	MID1	NS	0.968032
373928	PPARG	NS	-1.31364
373931	EGR1	0.734862	NS
373939	VAV3	-1.04654	-0.78596
373946	ITGA3	0.809325	NS
373952	nbl1	-0.890546	-0.671074
373954	BCL2L1	0.425697	NS
373965	CALD1	NS	0.445575
373981	HPSE	NS	-1.84744
373987	THBS1	0.355615	0.740711
373992	FBN1	-1.04545	-0.986043
373996	CAV1	NS	0.39242
374006	SAT1	NS	-0.474586
374042	SOD2	NS	0.580272
374058	ITGB1	NS	0.351472
374065	KCNMA1	0.970294	NS
374068	CDH5	-3.30983	-3.39748
374076	SIAH1	-0.518462	NS
374090	SEMA3C	0.560709	0.897483
374097	gnai3	NS	0.372209
374100	FLT1	-0.342791	NS
374110	PTGDS	-2.93881	-2.73009
374118	sufu	-0.380499	NS
374123	UBE2I	NS	0.335408
374133	RPL35	NS	-0.512623
374135	CTGF	0.48624	NS
374136	IL1RL1	-1.8426	-2.31095
374150	ID4	0.676662	NS
374157	NRP2	1.02962	1.06576
374178	TIMP2	0.515653	0.433077
374180	ENAH	NS	0.503857
374191	PDCD4	-0.614308	NS
374197	ACTR3	NS	0.355133
374253	TNKS2	-0.546987	NS
374254	LSP1	-2.19761	-2.68063
374268	pik3ap1	NS	-1.54139
374272	DUSP6	0.60197	0.629073
378424	ATXN3	-0.432414	NS
378779	BMP2	2.90128	1.63923
378788	FZD6	0.439458	0.647737
378795	HMGA1	0.552822	NS
378803	TNFRSF11B	0.783322	NS
378896	TERF1	NS	0.657497
378902	LOC378902	-0.645776	NS
378908	SLA	-3.20581	-4.64545
378909	PYGL	NS	-0.482678
378912	RGS2	1.96085	NS
378922	BUB1B	NS	0.390459
386583	MMP2	0.939957	1.09717
395074	CCDC80	-0.406243	NS
395081	TPX2	0.274962	0.323325
395099	CREB1	NS	0.421284
395109	RFTN1	0.419171	NS
395132	SMAD3	1.06886	0.819505
395142	ITGB5	0.562719	0.345068
395145	HMGCR	0.68915	0.430876
395152	AXIN2	-0.412041	NS
395154	DPYSL3	0.412324	NS
395156	CRMP1	-1.01076	NS
395161	OAF	0.645275	0.66621
395168	FAT1	NS	0.417354
395170	RGS9BP	-0.770861	NS
395175	EBF3	-0.905997	-1.28777
395178	uba7	0.400826	NS
395180	CXCL12	NS	0.973227
395203	SH3GL2	1.43	1.07406
395215	SDK2	-1.30601	-1.67936
395236	BID	0.613571	0.468054
395257	CBFB	-0.50394	NS
395267	FMO3	-3.39551	NS
395270	MOCS1	-0.379239	NS
395274	FAS	-0.415786	NS
395278	GJA1	0.289771	NS
395282	ID1	-0.815272	NS
395283	TRAIL-LIKE	0.624567	NS
395292	ROBO1	NS	0.427306
395299	SOCS3	0.740142	NS
395304	SREBF2	0.457143	NS
395309	IKZF2	0.671349	NS
395312	IL18	-0.921714	NS
395332	TES	0.437508	0.550093
395338	AKR1B10	0.821828	0.567357
395349	FSTL1	-0.471178	-0.375324
395355	CBX3	NS	0.343346
395375	BCKDHB	-0.858439	-0.845587
395380	CD164	NS	0.440474
395383	SLC16A3	NS	0.407205
395387	MMP9	-0.873327	-1.09659
395389	ALDH1A3	-1.90114	-0.5255
395395	GAD2	7.92241	7.0791
395405	TWIST2	NS	0.34473
395429	POSTN	NS	1.56148
395433	NPAS2	0.562216	NS
395460	TM9SF3	-0.313702	NS
395466	CSPG5	1.30949	1.06811
395468	CCL4	1.0052	0.450074
395472	TCIRG1	NS	-0.477437
395498	VDAC2	-0.307648	NS
395503	RUNX1T1	NS	0.414827
395519	MAFF	0.607223	NS
395543	SMAD9	-0.819947	NS
395566	AMT	0.458785	NS
395589	MEIS1	NS	0.675598
395599	SYNM	-0.804833	NS
395611	LOC395611	0.446233	0.621534
395630	RLIM	NS	0.366904
395643	PDLIM4	-1.22132	NS
395652	FKBP9	NS	0.3585
395653	HPRT1	-0.387636	NS
395657	SPON1	0.432471	0.597439
395672	UBE2A	NS	0.503477
395685	WSB1	NS	0.537196
395701	EZR	0.362562	0.35455
395719	TK1	0.467765	NS
395722	CLU	NS	-0.528628
395723	EEF1B2	-0.331955	NS
395734	RHOB	-0.46338	-0.54699
395736	NEDD9	-1.0395	NS
395760	SLC8A1	1.14086	NS
395789	RFNG	-0.428777	NS
395792	TBX6	-1.21914	NS
395796	RPS27A	NS	-0.409876
395805	MYOM1	NS	0.842286
395817	IGF2R	-0.531659	NS
395827	cyp24a1	11.3118	10.6676
395852	ID2	-0.866275	NS
395855	CALM	NS	0.435373
395856	FOXC1	0.757529	NS
395863	HPGDS	0.586878	NS
395870	RAC3	-0.665591	-0.619602
395875	COL12A1	0.944157	NS
395891	CACNA1C	1.19927	1.42654
395896	EFNB1	0.764534	0.918427
395897	TGFBI	NS	0.824013
395916	NME2	NS	-0.531162
395925	KCNJ5	1.23346	NS
395936	LRPAP1	NS	0.392439
395939	DIO3	-0.995724	-1.24423
395952	LDB1	NS	-0.473665
396002	AK1	0.507271	NS
396005	TSC22D1	-0.522802	NS
396006	PTRF	0.318012	NS
396023	DKK3	-2.98222	-1.86949
396045	GLI1	-1.6685	-2.12413
396104	SOX11	NS	0.471267
396129	SIM1	1.20954	NS
396133	FN1	0.476437	0.58576
396134	MET	0.723359	0.664737
396167	CCNB3	0.481156	NS
396174	MAP1B	0.759168	0.826191
396177	EPHB1	-1.76931	-2.22747
396180	SNRPE	NS	0.384947
396185	CEBPB	0.776368	NS
396186	BDNF	0.656733	1.43086
396189	VSNL1	1.2119	1.0006
396201	NCL	-0.303026	NS
396203	NPM1	-0.420699	-0.338196
396217	MBP	NS	-1.38038
396225	ITGA8	-1.11911	-0.904589
396226	ITGA6	0.613672	0.556525
396230	HOXB4	1.21091	1.25806
396232	HMGB3	NS	0.599029
396235	ETS1	NS	0.433842
396243	COL1A2	0.405982	NS
396246	FABP7	1.15372	0.982451
396248	CKB	-0.711018	-0.868651
396255	CALB2	2.28818	2.38025
396261	GOT1	NS	-0.544218
396282	BCL2	-1.04392	NS
396292	COL6A2	NS	0.304799
396308	BMPR1A	-0.600463	NS
396317	ALPL	NS	-0.518009
396324	ACVR2A	NS	0.46601
396325	EEF2	NS	-0.578621
396330	IRF7	1.25123	1.12099
396331	SEMA4D	1.47824	1.73432
396332	SEMA3D	NS	0.478869
396334	TCF12	-0.600182	-0.293188
396340	COL3A1	0.283229	0.345023
396353	NREP	NS	0.765001
396387	NTN3	0.459937	NS
396390	GATA6	0.883546	NS
396394	PLA2G4A	-1.19902	-1.35255
396413	FGF2	1.66292	NS
396420	ITGAV	0.609213	0.685817
396437	TXN	0.325992	NS
396452	PRNP	-2.48677	-2.06525
396466	NGF	1.41968	NS
396473	MARCKS	NS	0.38989
396478	LAMB1	-1.06119	NS
396481	IL1R1	-1.86392	-1.41517
396483	TIMP3	-1.04515	-0.788658
396484	MSX1	2.70197	3.01683
396492	GLG1	0.291694	NS
396497	CST3	-0.999693	-1.15893
396513	EPHB2	NS	-0.835459
396516	FGFR1	0.483109	0.513559
396526	ACTB	0.404173	NS
396529	ATP1B1	1.50513	NS
396545	EIF5A2	-0.468002	NS
396550	SCP2	0.779666	1.00026
404531	rbm12	-0.419496	NS
404746	ST6GALNAC3	-0.551592	NS
404771	GEM	NS	-1.50918
404774	SNTB1	-1.36642	NS
407091	UBAP2	2.66082	2.93407
408043	LAMC2	1.35657	1.06231
408047	TMSB4X	0.43872	0.48126
408051	PCDHGC3	0.452994	0.443813
414741	CD74	1.11873	0.684003
414745	CDH2	0.872273	0.9481
414800	LAMP2	0.326706	0.487473
415302	PML	NS	-0.636657
415319	ARIH1	NS	0.508985
415331	ZNF609	NS	-0.45618
415344	LINGO1	0.864043	0.743785
415379	BNIP2	-0.41243	NS
415392	LARP6	-0.566168	NS
415404	GCOM1	-0.767166	NS
415441	SPATA5L1	-0.648719	-0.658289
415453	GABPB1	NS	0.440109
415455	PDE8A	1.29129	1.59026
415458	HOMER2	0.718194	NS
415459	FAM103A1	NS	0.389496
415465	ADAMTSL3	0.428365	0.449359
415475	MESDC2	NS	0.47463
415491	FANCI	0.482083	NS
415499	MRPL46	NS	0.538528
415504	SLCO3A1	0.869998	1.34577
415521	CHSY1	NS	0.390188
415522	VIMP	0.364093	0.347605
415534	PARP16	-0.563014	-0.505378
415544	RAB11A	0.352512	0.391674
415549	MAP2K1	0.483821	0.321358
415553	AAGAB	0.388988	0.397655
415560	ITGA11	0.986961	0.676125
415561	CORO2B	0.731535	0.535112
415562	ANP32A	NS	0.641055
415567	KIF23	0.514869	0.420525
415569	UACA	-0.867373	-0.570989
415570	ADAMTS7	1.32156	1.37038
415582	SEMA4B	0.921949	NS
415591	iqgap1	0.338804	0.382098
415622	SLC7A6	-0.462815	NS
415633	ADGRG1	NS	0.94284
415646	CPNE2	-0.845441	-0.692966
415655	NUTF2	0.426982	NS
415698	GNAO1	NS	0.679079
415706	OSGIN1	0.97054	1.93595
415708	ripk3	0.939843	NS
415711	NFATC3	-0.459427	NS
415746	GPT2	NS	-0.89719
415773	LRP3	-0.591285	NS
415779	KCTD15	-0.66258	-0.413476
415782	KIAA0355	-0.69365	-0.521873
415796	BEAN1	-2.30706	-2.14688
415797	CDH11	-1.20937	-1.19341
415809	PNAT3	-0.871206	NS
415818	CRISPLD2	NS	0.816714
415820	HNF4beta	0.857947	0.906039
415823	MTHFSD	0.697346	NS
415824	GINS2	NS	0.482355
415830	JPH3	-1.66059	NS
415832	SLC7A5	-0.398323	-0.380548
415833	CA5	NS	0.414563
415849	FAM38A	0.414979	NS
415854	FANCA	0.620136	0.537219
415889	POC1A	NS	0.5872
415891	DUSP7	NS	0.482658
415894	STAB1	NS	-0.878633
415924	GMPPB	0.502106	NS
415970	RAB43	-0.639696	-0.502644
415987	CARD19	0.47251	0.61785
415990	BICD2	-0.577813	NS
416000	ARHGEF3	1.4547	1.5227
416026	ABTB1	-0.535193	NS
416038	TMEM43	0.428149	0.52203
416092	FOXP1	-0.494623	NS
416093	EIF4E3	-1.18962	-1.2655
416099	PDZRN3	NS	0.682465
416124	PLXND1	NS	-0.567476
416150	HTR4	1.67925	NS
416156	C1QTNF2	-0.756108	-0.647872
416196	ARAP3	NS	-1.00952
416221	SFXN1	NS	-0.569058
416240	CLINT1	NS	0.391192
416281	RNF130	0.399546	NS
416283	C13H5ORF45	0.992919	NS
416288	CANX	NS	0.298018
416291	ADAMTS2	-0.674986	-0.732993
416297	FAM13B	-1.15801	NS
416320	VDAC1	-1.39681	-1.01017
416326	P4HA2	0.458613	0.611286
416343	NR3C1	-0.479079	NS
416399	NME3	0.657643	0.610564
416402	NUBP2	NS	0.40381
416404	fam173a	2.92885	2.43354
416407	WDR90	0.57984	NS
416418	CPPED1	0.81613	0.704781
416436	TECPR1	-1.71911	-1.91742
416451	ADAP1	-0.498944	NS
416465	ELFN1	1.09555	1.16782
416467	NUDT1	0.440183	0.390598
416470	TTYH3	NS	0.357814
416477	CYP3A80	-2.21689	-1.59582
416490	ARPC1B	NS	-0.423488
416497	natd1	-1.13132	-0.993674
416505	NT5M	-0.704265	-0.509545
416523	GRAP	2.75524	1.88169
416550	slc9a3r2	-0.402817	NS
416553	PKD1	-0.505308	-0.537873
416554	RAB26	-0.654271	-0.512928
416558	MLST8	NS	-0.421727
416567	PRKCB	1.12653	1.51169
416575	PLK1	0.375211	NS
416623	METTL9	-1.05762	-0.831486
416626	CYTH3	-0.483311	NS
416628	RMI2	NS	-0.521594
416630	SOCS1	1.15725	NS
416647	RHBDF1	-0.56298	-0.496834
416653	FAM234A	NS	0.357511
416662	CDIP1	NS	-0.493635
416672	NMRAL1	0.501202	0.529272
416678	UBE2H	-0.388394	NS
416741	TASP1	NS	0.606625
416759	TMEM204	-1.64801	-1.41695
416768	HIC2	0.915833	NS
416769	UBE2L3	NS	0.451672
416791	GOLGA3	-0.399576	NS
416799	PUS1	-0.367671	NS
416811	AACS	0.506094	NS
416869	PPTC7	-0.468148	NS
416880	ALDH2	-0.703008	-0.763986
416910	TPST2	-0.658146	-1.03863
416920	KREMEN1	-0.694581	-0.484111
416924	LOC416924	NS	-0.532305
416933	CHCHD10	-0.573386	NS
416934	DERL3	NS	-1.02749
416945	GGT1	NS	0.924752
416955	YWHAH	NS	0.473104
417007	MTFP1	0.630371	NS
417026	C15H12orf49	-0.394535	NS
417029	RBM19	-0.374137	NS
417044	RACK1	NS	-0.454851
417050	DMA	0.784081	NS
417134	PMPCA	-0.368876	NS
417139	FAM69B	-1.83431	-1.88047
417175	POMT1	0.616323	NS
417179	C9ORF58	-1.15249	-0.800743
417185	ASS1	-0.649043	-0.680446
417209	PKN3	NS	0.651184
417231	COL27A1	NS	-0.639511
417247	TNFSF15	-0.856391	-1.06989
417248	C17H9ORF91	NS	-2.79004
417255	TUBB4B	0.505447	NS
417259	TPRN	NS	-0.841316
417295	UAP1L1	1.08746	1.14514
417317	NDEL1	NS	-0.655658
417332	METRNL	0.483939	0.559471
417339	WDR45B	-0.441648	NS
417341	NARF	NS	0.586206
417347	2018-09-09	0.478303	0.374217
417385	NOTUM	-1.20116	-0.765841
417386	LOC417386	NS	-0.83046
417387	MBTD1	-0.569952	NS
417395	HLF	-0.743843	NS
417412	C18H17orf75	-0.587802	NS
417435	SLC16A6	-0.497211	NS
417437	WIPI1	-0.874713	-0.738393
417456	NPLOC4	NS	0.362138
417479	CALN1	-0.634695	NS
417513	rasa4	NS	-0.602763
417515	DTX2	0.462062	NS
417546	TPST1	0.495737	NS
417619	NXN	0.678708	0.464591
417629	SKA2	0.493538	NS
417632	YPEL2	-0.459207	NS
417636	TUBD1	0.88021	NS
417657	DUSP14	0.375338	0.683218
417665	CUEDC1	NS	0.798135
417699	DLD	-0.330734	NS
417717	DNAJC2	NS	0.368756
417750	WASL	-0.501825	NS
417761	CPED1	-0.53921	NS
417813	LRIG3	-0.995191	NS
417839	MDM1	NS	1.82247
417869	NAV3	0.800285	NS
417891	LUM	0.647022	1.37596
417892	DCN	4.01689	4.26927
417897	NUDT4	-0.407955	NS
417912	METAP2	-0.324867	NS
417913	USP44	-0.751272	NS
417914	NTN4	0.824241	0.613589
417962	LOC417962	-0.530032	NS
418015	SYNGR1	-0.474762	-0.408678
418016	RPL3	NS	-0.304711
418033	EIF3L	NS	-0.360489
418057	RASD2	-1.55738	NS
418073	CKAP4	0.321563	0.609689
418082	TXNRD1	0.835155	1.14673
418085	GLT8D2	NS	0.530912
418096	GNPTAB	-0.427855	NS
418143	TMTC1	-0.718716	-0.568042
418167	USP18	0.869949	0.855996
418172	BPGM	-0.490288	NS
418212	ITPR2	-0.495414	NS
418235	PARVB	-0.50771	NS
418256	MFAP5	-1.28755	-1.02167
418267	CSTB	-0.370598	NS
418268	CSTA	-0.852832	-0.69049
418283	COPS7A	-0.349075	-0.376312
418286	PTMS	-0.343511	NS
418295	C1R	0.392051	NS
418313	TBX15	NS	-2.00206
418378	COL8A1	-2.08597	-2.51837
418404	nfkbiz	-0.558805	NS
418409	IFT57	0.515899	NS
418415	pvrl3	-1.52719	NS
418430	PROS1	0.449739	0.688523
418493	HUNK	NS	-0.712714
418532	C2CD2	-0.440669	NS
418568	RPL8	NS	-0.362698
418595	PDK3	-0.373908	NS
418614	RAI2	-1.90765	-2.3641
418649	WWC3	-0.685939	-0.48508
418666	LOC418666	2.67509	NS
418692	MGAT4A	-0.842463	NS
418749	ATP11A	-0.5143	NS
418761	ARHGEF7	-0.570081	NS
418781	FARP1	0.65765	0.79875
418784	MBNL2	-0.598085	NS
418808	MYCBP2	-0.432796	NS
418839	enox1	NS	1.02202
418843	GTF2F2	0.64847	0.642652
418865	CAB39L	-0.957071	NS
418882	CKAP2	NS	0.407019
418886	SLC25A15	-1.11437	-1.06557
418892	LOC418892	-2.20828	-1.95733
418896	SUPT20H	-0.922785	-0.648795
418928	LNX2	-0.519281	NS
418935	RNF6	-0.43258	NS
418940	SPATA13	-0.482908	NS
418943	TNFRSF19	-0.866519	-0.426839
418947	ZDHHC20	NS	0.313262
418992	MTMR2	NS	0.278905
419020	RAB30	-0.414578	NS
419030	USP35	-0.52892	NS
419052	PGM2L1	-0.538787	NS
419057	P4HA3	0.861217	0.509569
419067	RELT	0.97843	0.588797
419077	SMPD1	NS	-0.612941
419082	STIM1	0.541261	NS
419083	PAK1	0.473857	NS
419084	GDPD4	-0.563041	NS
419087	ACER3	-0.581601	NS
419088	TSKU	-2.02944	NS
419111	ITIH5	-1.39713	NS
419116	SRSF6	NS	0.402096
419145	ITCH	-0.495164	NS
419171	FAM83D	-1.64313	-1.4946
419176	ZHX3	-0.453445	NS
419184	SDC4	1.00535	NS
419195	PKIG	-0.727437	NS
419221	FAM217B	-0.583932	NS
419231	SLCO4A1	NS	-0.615165
419238	YTHDF1	-0.388124	NS
419248	PCMTD2	-0.53487	NS
419265	HELZ2	NS	-1.30029
419293	BPI	-0.790041	-1.34323
419303	ACOT8	NS	-0.492193
419310	SLMO2	-0.337596	NS
419311	CTSZ	-0.642451	-0.443148
419318	rab22a	-0.637162	NS
419327	TFAP2C	-0.507464	NS
419346	NFATC2	NS	0.594521
419371	ACOT7	NS	-0.411017
419403	NADK	-0.541534	NS
419404	LOC419404	-0.384397	NS
419407	MMP23B	NS	1.11884
419412	ATAD3A	NS	-0.447886
419434	SAMD11	NS	-0.565635
419455	MTOR	-0.454106	-0.627187
419457	PLEKHM2	-0.355007	-0.365139
419485	PLOD1	NS	0.429545
419489	MTHFR	NS	-0.374618
419494	FBXO6	-0.664491	NS
419521	RASSF2	-2.11076	-2.18063
419552	LAPTM5	-0.828467	-0.946698
419584	LOC419584	0.52911	NS
419597	TRNAU1AP	-0.438386	-0.820329
419613	RSPO1	-1.24457	NS
419665	KIAA1522	-2.36302	-2.42858
419679	MFSD2A	0.583655	NS
419710	CDON	0.407939	NS
419747	CLMP	0.495562	0.872205
419759	ZBTB16	-1.08894	NS
419774	SCN4B	0.567346	NS
419779	MPZL2	0.480056	0.55615
419790	PHLDB1	-2.0836	NS
419815	SRSF3	NS	0.448303
419827	TMCC2	NS	-0.671848
419838	PM20D1	NS	0.466894
419846	DYRK3	-0.770316	-0.458955
419849	c1orf116	-3.70673	-3.52778
419860	G0S2	1.34257	NS
419910	ITPR3	NS	0.755008
419916	OARD1	NS	0.490384
419933	PRELP	-0.426123	-0.573018
419934	ATP2B4	-0.343677	-0.389559
419950	mrc2	1.08509	1.06931
419951	TANC2	0.487357	0.677391
419963	MYO1D	-0.388684	-0.520389
419997	PSMB3	0.342823	NS
420034	NT5C3B	-0.679859	NS
420051	CTXN1	-0.673662	-0.973319
420074	MFSD12	-0.681764	-0.831534
420090	ACSBG2	0.562277	NS
420102	hmha1	NS	-0.757231
420104	SBNO2	0.482736	NS
420120	COMP	-1.45993	-0.935904
420129	IFI30	-0.886971	-0.958898
420133	INSR	-0.500205	NS
420148	KLF2	-0.540815	-1.24012
420167	SGK3	-0.456929	NS
420172	PREX2	-0.497719	NS
420176	NCOA2	-0.405624	NS
420201	CHMP4C	-1.64732	-2.11955
420232	TP53INP1	-0.499297	NS
420242	VPS13B	NS	0.430314
420243	COX6C	NS	0.479662
420267	LRP12	-0.383969	NS
420269	ZFPM2	-4.53026	-2.88162
420289	TRPS1	-0.43894	NS
420317	KHDRBS3	-1.52482	-0.989606
420321	NDRG1	-0.433417	-0.519347
420332	MYC	-0.361232	-0.800425
420335	SQLE	0.345759	NS
420336	MTSS1	-1.04053	-0.563095
420343	FBXO32	-0.712724	NS
420362	LOC420362	NS	-0.539295
420384	AQP1	0.58367	0.572727
420405	KIF9	6.57157	6.88891
420425	CSRNP1	-0.60689	NS
420440	DPP6	8.40958	6.15764
420442	INSIG1	0.369196	NS
420459	IDI1	0.55641	NS
420463	KLF6	-0.507433	NS
420475	svil	-0.341866	NS
420548	CYP51A1	0.415499	NS
420556	EFCAB1	-1.7602	-1.68331
420599	HDAC9	-0.631667	NS
420663	OSBPL10	NS	-1.0065
420664	GPD1L	-0.415519	NS
420675	SNRK	-0.527916	NS
420716	LOC420716	2.36599	2.02302
420728	TRANK1	-0.62417	-0.725593
420735	ELMO1	-0.725186	-0.626904
420738	ANLN	NS	0.385651
420772	PSMA2	NS	0.415808
420792	TNS3	NS	0.460552
420851	TMEM14C	-0.500229	-0.437635
420856	hivep1	-0.463374	NS
420857	tmem170b	-0.922072	-0.769909
420883	TUBB2B	0.544234	NS
420957	tmem245	-0.453041	NS
420989	AHRR	-0.511327	NS
420996	NR4A3	-2.27741	-1.21537
421037	TUBB6	0.558306	NS
421053	ARHGAP28	NS	1.42925
421060	TYMS	0.465109	0.595888
421061	COLEC12	NS	0.743109
421063	USP14	NS	0.351631
421086	TAF4B	-0.756433	NS
421126	TGS1	-0.564234	NS
421136	SDCBP	-0.683168	-0.649166
421149	UBE2T	0.506483	NS
421153	DENND2D	NS	-2.41249
421165	RNPEP	0.400269	NS
421169	TUBA3E	0.501874	NS
421174	PTPRVP	NS	-0.645223
421210	CCDC88A	NS	-0.567136
421226	BUB1	0.371913	NS
421246	rin2	-0.606003	NS
421257	PTK7	0.575714	0.475131
421286	B3GNT2	-0.80954	NS
421301	LBH	0.322472	NS
421303	LCLAT1	NS	0.410227
421339	HHIPL2	5.43282	2.78737
421369	ATF3	-0.510982	NS
421422	DAAM2	-0.565365	NS
421443	MRPL14	0.356605	NS
421445	MRPS18A	0.461729	NS
421461	LTBP1	0.41889	0.607392
421502	LOC421502	2.44	3.74611
421507	GREM2	-1.28435	-0.85446
421537	abcb10	-0.958134	-0.588038
421559	SMOC2	1.20839	1.39187
421577	PARK2	-0.741118	NS
421587	ACAT2	0.339611	NS
421599	QSER1	-0.802651	NS
421602	EIF3M	-0.354384	NS
421654	SNX9	-0.478331	-0.437907
421692	PDE7B	-0.500621	-0.409991
421702	VNN1	0.604538	0.589852
421718	HEY2	-1.75991	-1.91765
421726	MAN1A1	0.493781	NS
421756	CDK19	-0.452904	NS
421769	FOXO3	-1.14811	-0.557317
421790	ASCC3	-3.0862	-2.96038
421816	PM20D2	-0.954197	NS
421878	PRIM2	NS	0.643976
421879	RAB23	NS	0.81003
421891	LRRC1	-0.846265	NS
421896	ICK	-0.53769	NS
421918	ADI1	-0.510655	NS
421921	CMPK2	-1.17955	-1.28881
421940	PDIA6	0.32206	0.380756
421960	sdc1	NS	0.593042
422002	LOC422002	-2.50659	-2.38711
422038	FDFT1	0.466134	NS
422062	TNFRSF21	NS	-0.702552
422119	HN1	NS	0.358555
422131	MID2	-2.13482	-1.75331
422168	HEPH	-1.74619	-1.82559
422171	LOC422171	0.536873	0.517857
422179	LOC422179	-1.09157	-1.26025
422196	DKC1	-0.46279	-0.425732
422197	MPP1	0.84385	0.971264
422221	FYTTD1L	-0.561314	-0.554969
422222	PLS3	-0.529116	-0.363996
422230	IL13RA1	NS	0.72912
422234	GPC4	NS	0.321035
422263	PCDH19	1.16255	0.812542
422293	LOC422293	-1.55323	-1.53891
422302	NSDHL	0.696651	NS
422312	MTMR8	NS	0.559654
422332	MAGT1	NS	0.529857
422336	AMOT	-0.439681	NS
422341	CAPN6	NS	0.400009
422343	AMMECR1	NS	0.428203
422345	ACSL4	0.518335	NS
422346	NXT2	NS	0.646311
422351	PSMD10	0.689848	NS
422360	STAG2	NS	0.44804
422363	MCTS1	NS	0.448424
422364	CUL4B	NS	0.494134
422372	LOC422372	NS	0.402704
422376	COMMD5	0.473374	0.447899
422380	NRK	0.43412	0.532358
422381	C4HXorf57	NS	0.499739
422384	PASD1	0.906041	NS
422385	VMA21	NS	0.540002
422387	MTMR1	NS	0.409564
422413	FAM198B	NS	-7.06293
422417	FNIP2	-0.485112	NS
422423	MSMO1	0.827704	NS
422424	CPE	-0.681003	-0.891257
422438	PCDH18	-0.746182	NS
422439	ELF2	-0.490547	NS
422441	RAB33B	-0.364159	NS
422443	SETD7	-0.386695	NS
422454	INPP4B	NS	0.56991
422476	LRBA	0.95115	0.96256
422477	RPS3A	NS	-0.278041
422503	PARM1	0.737281	NS
422512	CCNG2	-0.486161	NS
422562	SAP30	0.419169	NS
422573	VEGFC	1.38846	NS
422580	ANTXR2	NS	0.653811
422590	AFF1	NS	-0.59895
422598	SCD5	-0.496334	-0.451765
422635	2018-09-11	0.357976	0.353658
422648	DCK	NS	0.565965
422660	ugt2a1	0.440301	0.627457
422661	SULT1B	-0.606248	-0.857365
422662	SULT1E1	NS	-0.545337
422672	NDNF	0.628954	0.746617
422680	USP53	-0.724582	NS
422688	CAMK2D	-0.470796	NS
422693	AP1AR	-0.569156	NS
422728	fgl1	-0.99156	-1.07329
422729	MTUS1	-1.02086	-0.585601
422743	PPAT	-0.379028	NS
422786	N4BP2	-0.49658	NS
422849	CYTL1	-0.817167	-0.835844
422857	WFS1	NS	0.612942
422890	MXD4	-0.578414	NS
422899	TACC3	NS	0.402115
422905	SPON2	NS	3.30703
422934	SMOX	NS	0.695335
422964	TMEM258	0.599499	NS
422982	DHCR7	0.452317	NS
423004	RMDN3	-0.490676	NS
423037	MRVI1	0.774754	1.22861
423046	IPO7	NS	-0.299472
423047	TMEM41B	-0.403468	NS
423071	NUCB2	NS	0.434555
423088	PHLDA2	0.393567	NS
423111	RNH1	NS	0.382795
423118	CPT1A	-0.827562	-0.679353
423122	FADS2	0.711881	0.512134
423123	RAB3IL1	-0.580422	-0.388928
423192	ATG13	-0.352936	NS
423209	CHAC1	1.10912	-0.893152
423213	NUSAP1	0.637817	0.467309
423231	TMEM87A	-0.377674	NS
423278	PLEK2	NS	0.387721
423302	PRKD1	-0.692223	NS
423308	STRN3	-0.441714	NS
423310	hectd1	-0.518836	NS
423311	HEATR5A	NS	-0.541137
423323	FAM177A1	-0.418425	NS
423346	LIN52	-0.45605	NS
423356	YLPM1	-0.534997	NS
423363	JDP2	NS	-0.607119
423372	tmem63c	-0.984887	-1.0927
423394	GALC	NS	0.612427
423413	FBLN5	-4.09997	-4.40962
423450	cyp46a1	-0.595651	NS
423451	PKDCCb	-1.6441	-2.55432
423480	MARK3	-0.313873	NS
423489	KIF26A	NS	0.708806
423504	HSPA2	NS	-0.345637
423531	L3HYPDH	NS	-0.978386
423532	DAAM1	-0.662447	NS
423536	KCNK4	-1.06721	NS
423559	SAMD4A	-0.436323	-0.377734
423581	GNG2	0.339499	NS
423584	TXNDC16	-0.628567	NS
423585	ERO1L	0.428394	0.53754
423606	CCSER2	-0.557177	NS
423615	NCOA4	-0.45676	NS
423616	TIMM23	NS	-0.372375
423617	PARG	-0.984431	-0.692384
423628	MAT1A	-1.06326	-1.22174
423633	BMS1	-0.35971	NS
423634	TMEM254	-1.12454	-0.745503
423637	ANXA11	-0.586383	-0.546275
423638	ecd	-0.528691	NS
423639	FAM149B1	-0.52157	NS
423646	SIRT1	-0.628421	NS
423654	REEP3	-0.381689	NS
423655	JMJD1C	-0.456826	NS
423658	ZNF365	-0.584911	-0.518353
423662	C6H10orf107	1.64673	1.87696
423666	CCDC6	-0.537149	-0.349448
423669	CHUK	-0.393597	NS
423672	ADAM8	0.553293	NS
423675	PTEN	-0.454277	NS
423676	ATAD1	-0.49216	-0.362379
423678	PAPSS2	-3.62178	-2.38565
423682	PRKG1	-0.514758	-0.369703
423689	SLC25A16	-0.519309	NS
423693	LOC423693	-0.533893	-0.437093
423696	VPS26A	-0.560561	NS
423714	SGPL1	-1.10432	-1.00601
423716	UNC5B	-0.81741	-0.901168
423722	ZCCHC24	-0.670793	NS
423724	ZMIZ1	-0.618922	NS
423726	RPS24	-0.468164	-0.518525
423727	POLR3A	-0.711112	NS
423730	COMTD1	-1.24408	-0.809768
423734	KAT6B	-0.569705	NS
423746	USP54	-0.541017	NS
423747	ANXA7	-0.941519	-0.92624
423748	EIF3F	-0.528215	-0.643715
423749	sorbs1	-0.472711	NS
423750	HELLS	-0.348336	NS
423755	NOLC1	-0.475377	-0.366026
423758	GBF1	-0.305445	-0.374059
423759	TMEM150A	-0.571501	-0.772132
423760	PSD	-1.67506	-1.90695
423770	2018-03-08	-0.917325	NS
423772	fam21a	-0.644804	-0.522011
423775	ANTXRL	-0.84398	-0.5426
423787	ACTA2	NS	-0.366417
423789	lipA	-0.424823	NS
423796	PCGF5	-0.720031	NS
423800	SLC35G1	-0.586782	NS
423814	IDE	-0.473823	NS
423815	2018-03-05	-0.422258	NS
423817	BTAF1	-0.51493	NS
423826	ENTPD1	-0.853629	-0.399867
423827	dnmbp	-0.476012	NS
423833	CNNM1	NS	-0.915282
423839	ZFYVE27	NS	-1.14366
423842	MMS19	NS	-0.576629
423848	pprc1	NS	-0.491189
423864	TRIM8	NS	-0.487604
423867	WBP1L	NS	0.379658
423872	TAF5	-0.556711	NS
423878	SLK	-0.601935	NS
423888	MXI1	-0.50969	-0.586783
423889	SMNDC1	-0.382172	NS
423905	CCDC186	-0.605918	NS
423911	ABLIM1	-1.15524	-0.903836
423912	FAM160B1	-0.44538	NS
423923	EMX2	-0.53188	-0.340486
423924	RAB11FIP2	-0.579245	NS
423926	CACUL1	-0.504699	NS
423927	EIF3A	-0.307936	-0.425255
423930	RGS10	-0.52349	NS
423932	INPP5F	NS	-0.495956
423936	ATE1	-0.602118	NS
423953	ZRANB1	-0.514057	NS
423965	MGMT	-0.443339	NS
423967	LOC423967	-0.701055	-0.484573
423971	BNIP3	-0.860465	-0.897312
423972	PWWP2B	NS	-0.442369
423973	INPP5A	-0.617323	NS
423976	ALDH18A1	NS	-0.433606
423984	SLC40A1	NS	0.586439
423986	COL5A2	0.57397	NS
423989	TFPI	-1.41397	-1.14665
423990	CALCRL	-0.943635	NS
424000	NCKAP1	NS	0.426055
424016	RAMP1	0.950525	0.715038
424029	TRAF3IP1	NS	0.499395
424030	ASB1	NS	0.429911
424037	LSS	0.789149	NS
424062	RFTN2	NS	0.486906
424081	CASP10	NS	0.688493
424112	idh1	0.568156	0.717907
424115	DNAJC10	NS	0.455223
424116	PDE1A	NS	1.155
424121	ITGA4	0.402241	0.596608
424129	FKBP7	0.402145	0.392885
424130	osbpl6	1.24727	0.837721
424155	LOC424155	-0.422103	NS
424172	SPC25	0.471281	0.580359
424192	LY75	0.554379	NS
424220	IGFBP5	0.974266	NS
424249	PDIA5	0.603101	0.54812
424261	AMHR2	-0.598885	-0.501512
424277	CCDC93	NS	-0.475399
424298	HNMT	-1.82103	-2.26306
424315	TNFAIP6	2.87865	2.40527
424366	OLFML2B	-0.855067	-0.515652
424373	C14orf80	0.478392	NS
424375	PACS2	-0.53344	NS
424381	PHGDH	-2.26282	-2.3296
424404	MGST3	0.501682	NS
424439	RC3H1	-0.42537	NS
424446	RGL1	-0.503872	-0.535477
424450	EDEM3	NS	0.575563
424461	OLFM3	1.60071	NS
424477	LPPR5	-1.31366	NS
424499	TMED5	NS	0.316987
424530	SYDE2	NS	-0.658754
424563	CDC20	0.410043	0.378438
424573	IPO13	0.465626	NS
424575	ATP6V0B	NS	-0.436976
424588	LOC424588	0.613999	NS
424598	PRDX1	NS	0.373525
424623	TRABD2B	-0.987434	NS
424631	RNF11	NS	0.419465
424643	GPX7	NS	0.635593
424647	PODN	1.11553	1.43347
424649	cpt2	0.56769	0.801172
424656	TMEM59	NS	0.350513
424666	PLPP3	-1.40257	-0.954933
424707	WLS	0.351877	0.393008
424716	CTH	-0.530268	-0.482553
424726	CCDC101	0.547797	0.402095
424758	plekhb2	-0.371257	NS
424770	GPC1	-0.880006	NS
424779	GK5	-0.948004	NS
424780	TFDP2	-0.448533	NS
424786	DNER	1.71836	1.80175
424805	SERPINE2	0.535264	0.521455
424819	CLSTN2	1.00221	1.22766
424880	CCDC61	0.54749	NS
424889	NCBP2	NS	0.421987
424906	CCDC50	0.292854	0.287882
424907	OSTN	-2.4199	-2.15808
424908	IL1RAP	0.51564	0.601497
424918	LOC424918	1.22564	0.782442
424926	PSMD1	NS	0.312269
424983	ECT2	0.465236	NS
424990	CLDN11	1.38579	NS
425017	MFSD1	-0.601188	NS
425052	TCP11L2	-0.454301	NS
425061	FDPS	0.917167	NS
425104	ZFAND2A	0.639999	0.372385
425132	NPRL2	-0.516299	-0.602523
425201	RTN4RL2	0.647923	NS
425224	PLCE1	-0.683573	NS
425328	PPP1R3C	2.37549	NS
425353	DYSF	0.520099	NS
425359	MVD	0.582746	NS
425389	BF2	NS	-0.561089
425403	SLC9A5	-1.03698	NS
425454	IGSF9	0.502851	NS
425536	ESPL1	0.588134	NS
425576	TPP1	-0.441863	-0.775984
425619	YWHAZ	NS	0.349145
425660	vps72	0.505813	NS
425843	ADAM12	0.572268	0.44443
425900	ANKRD12	-0.668869	NS
425968	Krtap10-4	1.73233	NS
425976	BCAN	0.963883	0.629041
425978	SH2D2A	-1.70373	NS
425984	NBEAL2	NS	-0.659152
425986	LOXL3	-1.2815	-1.44358
425991	PICALM	-0.408907	NS
426120	PARD3B	-0.476362	-0.338338
426208	WDR76	0.564964	NS
426211	KAZN	NS	-0.882142
426284	TBL1XR1	NS	0.472
426357	CHTOP	0.381922	NS
426361	H2AFZ	NS	0.300469
426376	FAM107B	-0.522318	NS
426419	UNC5A	-2.13486	-2.50275
426430	OAT	-0.513693	-0.551384
426455	TMEM52B	10.9052	11.056
426482	SHC4	0.653632	0.518994
426504	RP11-529K1.3	-0.483455	NS
426548	TGOLN2	NS	0.441558
426569	apoa1bp	0.515142	NS
426611	C4	0.958393	0.586271
426666	MRPS21	0.548633	NS
426704	KNSTRN	NS	0.41964
426765	APCDD1	NS	0.46488
426769	ERLIN2	-0.295333	NS
426846	LIPG	0.886404	0.413714
426884	RACGAP1	0.428912	NS
426928	ENPP3	0.395921	NS
426932	BBOX1	1.09426	1.11208
426948	LZTS3	NS	-1.01638
426955	abca2	1.86903	2.02851
426962	GFPT2	0.977104	0.622191
427113	MCTP1	1.26324	1.31306
427121	CAST	0.331492	NS
427134	UBE2R2L	2.38984	2.72989
427150	PLK2	NS	0.870415
427190	OXCT1	-0.427688	NS
427198	PARP8	-0.850971	NS
427245	FAM189A2	-2.20946	NS
427301	SLC44A1	-1.48662	-1.09303
427339	LPAR1	0.709217	1.05044
427421	PDZD2	-2.10425	-2.05875
427430	C1QTNF3	NS	0.727556
427446	OSMR	0.620536	0.682311
427449	DAB2	NS	0.573186
427462	GOLM1	0.880299	0.623678
427481	OAZ2	0.369259	0.457479
427493	KLF13	-0.359455	NS
427515	CALML4	0.751553	NS
427533	LOC427533	-1.23324	-0.820688
427538	HYDIN	-0.803451	NS
427539	B3GNT9	NS	0.481321
427588	KLF15	NS	-1.02728
427626	NEURL1B	-0.716354	NS
427638	GPX3	0.646137	NS
427666	C1QTNF8	-3.01015	-2.09427
427681	TMEM8A	0.480811	0.372154
427758	RALGDS	-0.351474	-0.435681
427882	LOC427882	0.54046	NS
427898	FAM109B	-0.556646	-0.371068
427971	ADAMTS5	-0.75563	NS
427999	PPEF1	2.64113	3.33022
428062	TBC1D4	-1.14727	-1.04211
428088	MAML2	NS	0.418186
428095	RAB38	NS	-1.13449
428121	LRRC32	0.442451	1.13425
428135	GSS	-0.456199	-0.666899
428148	LAMA5	0.603965	0.49376
428163	CTSA	-1.25109	-1.36247
428164	PLTP	-1.23896	NS
428167	AURKA	0.400764	0.392925
428168	FAM210B	-0.527286	-0.543054
428199	ANTXR1	-1.93217	-0.826203
428261	LRRN2	-3.03231	-4.01333
428278	LOC428278	-2.66488	-2.76262
428374	PTDSS1	NS	0.751278
428385	ASAP1	-0.455275	NS
428387	tmem65	-0.384064	NS
428398	ZBTB47	-0.497669	-0.394224
428411	PFKP	NS	0.334637
428427	SLC25A13	-0.555565	NS
428431	GPNMB	-2.80634	-2.43271
428432	OSBPL3	-0.753485	-0.676597
428437	CHN2	-0.548769	NS
428441	KAT2B	-0.513999	NS
428453	FYCO1	-0.536139	-0.460031
428492	FBXL7	-0.882433	NS
428510	LOC428510	NS	0.860745
428543	EFEMP1	NS	0.515607
428570	SOCS5	NS	0.588981
428635	SNAP91	NS	-2.05548
428645	FAM83B	NS	0.666525
428703	FOXO4	-0.515901	NS
428717	GAB3	-0.859105	-0.577009
428767	ANXA5	NS	0.314095
428772	ELOVL6	NS	0.391512
428842	olfml1	1.7127	1.85853
428925	mgat2	0.4006	NS
428930	FRMD6	NS	-0.391897
428932	GPR137C	-0.60064	NS
428946	SAMD8	-0.53548	NS
428972	SFXN3	NS	-0.723938
428973	LZTS2	NS	-0.520707
428984	PDZD8	-0.403968	NS
428996	LRRFIP1	NS	0.543895
428997	CXCR7	0.506475	0.558528
429035	TUBA1C	0.701546	NS
429083	DPYD	-0.888176	-0.971684
429096	PIK3R3	-0.392125	NS
429106	SLC1A7	0.952731	1.32443
429117	SLC44A5	NS	0.891041
429166	SYT11	NS	0.3082
429172	PAN2	NS	-0.645673
429219	RNF157	-2.33625	-2.29995
429363	APC2	0.931237	NS
429534	GLTP	-0.639311	-0.976042
429807	TRIM62	NS	-0.46261
429828	Cyp21a1	0.87133	NS
429879	HPS1	NS	-0.899828
429986	PSMB4	0.414956	NS
430337	ENTPD7	NS	-0.613845
430411	slc39a8	-2.14712	-1.69643
430442	PGLS	NS	-0.586916
430516	LIG1	0.387659	NS
430563	NAA40	0.450403	NS
430669	EFHD2	-4.99003	-5.6069
430674	EDRF1	-0.735877	NS
430750	RAB31	-0.936631	-0.727984
430997	PABPC1	-0.323433	-0.290633
431014	TNK2	0.651308	NS
431056	IDH2	0.478194	NS
431253	TACC1	NS	-0.381203
431530	RFX7	-0.434204	NS
431558	UBTD1	NS	-0.494525
431608	SMC5	NS	0.466175
448832	MCAM	0.67062	0.648023
693252	IL6R	NS	-1.30306
693261	SP5	1.46929	1.45803
693266	CASP18	0.780878	1.0239
723789	DACT1	-0.637913	NS
768337	TUBB2A	0.532405	NS
768374	LOC768374	NS	0.371788
768530	PLA2G15	-0.818278	-0.67215
768536	TAAR1	0.918532	NS
768541	TBC1D12	-0.473552	NS
768555	MVK	0.444285	NS
768556	SLC26A11	NS	-0.859041
768603	FAM53B	-0.789547	-0.902191
768655	PIM3	-0.346951	1.09479
768680	CREG1	NS	0.446131
768796	HYLS1	0.596794	NS
768809	UST	-1.21831	-1.13047
768819	SMKR1	1.24262	NS
768854	ATP6V0E1	-0.360438	NS
768898	DDX50	-0.528265	-0.337537
768904	DPT	0.501858	0.702535
768957	MRPL24	0.475693	NS
768974	RRNAD1	0.647224	NS
769037	COL13A1	-1.24481	-1.03409
769066	TP53INP2	-0.577608	-0.603469
769087	ANGPTL4	1.35253	0.608211
769112	CHPF	0.498019	NS
769120	GCNT7	-0.795265	-0.684794
769134	ARL8BL	7.24142	6.40499
769140	BMF	-1.29407	NS
769167	CYSTM1	0.531728	NS
769222	ADAMTS8	2.36595	2.2295
769256	IL17REL	-0.880365	NS
769288	STOX2	-0.548409	NS
769368	EEF1D	-0.435318	-0.387389
769373	TYSND1	NS	-0.596129
769410	SPTB	-0.634832	-0.817387
769421	LOC769421	-0.85497	-1.03419
769461	LRRC20	NS	-0.746771
769603	GNG10	1.02856	1.04571
769609	CHTF8	0.508861	NS
769612	SLC1A4	NS	-0.570215
769652	SLC2A13	-0.451476	NS
769729	LOC769729	-0.549162	-0.732601
769794	SF3B5	0.43454	NS
770022	LOC770022	0.589263	0.669202
770043	CCBE1	0.606188	0.946069
770045	RPE	0.534635	NS
770053	JTB	0.594624	NS
770103	TPM3	NS	0.294728
770140	CTIF	NS	0.589872
770162	CIB1	0.514382	NS
770168	GAS1	NS	0.595902
770193	CHST14	0.401719	0.365523
770233	SIDT2	NS	-0.48335
770238	KLF9	NS	0.683665
770258	DTYMK	0.42943	NS
770283	GFOD1	-0.987352	-0.693314
770307	HYPK	0.371842	NS
770328	HPS6	NS	-0.45216
770334	PSD3	-1.00328	-0.65375
770336	PRC1	0.61921	0.436508
770397	c1orf216	NS	-0.742829
770406	FXYD6	NS	-0.371197
770421	SYNPO	0.984472	0.694231
770430	NPM3	NS	-0.49517
770560	ZNF703	NS	-0.484727
770573	LRRC45	-0.698123	NS
770610	ABCA7	0.662793	NS
770620	NPDC1	NS	-0.55065
770683	HIP1	NS	-0.405666
770718	LOC770718	NS	-0.96342
770734	PRODH	-0.702615	-1.17676
770764	MARCKSL1	1.09924	0.667304
770780	WBP2NL	-0.547861	NS
770874	RGS7BP	2.25514	2.5643
770922	dguok	NS	0.507612
770979	MRPL20	-0.427599	NS
771001	OGG1	0.852352	NS
771032	c8orf4	0.882486	NS
771117	SCARA3	-0.538099	-0.727504
771284	MKX	NS	-1.65307
771364	CBY1	NS	-0.48443
771422	LOC771422	0.8631	NS
771447	SRM	NS	-0.315508
771493	BTBD11	-0.58793	NS
771494	LOC771494	-1.33945	-0.754641
771523	osr2	NS	-0.411803
771624	C12orf75	-0.871994	-0.569462
771702	SPAG5	0.402362	NS
771738	ATOH8	-1.07496	-1.11243
772026	RPH3AL	1.71946	1.28618
772072	PRR11	0.541965	NS
772083	AGBL4	1.12398	0.872498
772127	PLEKHH3	0.76186	NS
772150	NDUFA1	0.75652	NS
772196	PGRMC1	0.301184	0.352315
772201	ASPG	-0.549864	-0.698519
772208	TXNDC12	NS	0.402338
772225	SLC25A5	0.368708	NS
772263	SCARF2	NS	-0.561241
775973	FMN2	-1.20323	-0.93188
776014	BAHCC1	0.424015	NS
776031	angptl2	NS	0.879923
776097	FBXO39	NS	0.70261
776127	ADSSL1	-0.471924	NS
776594	LOC776594	NS	0.69135
776802	CBX5	0.449869	NS
776816	LOC776816	0.383378	NS
776932	nat8b	-1.31219	-1.28162
791224	MTG1	NS	-0.656204
100049058	DAG1	0.441615	NS
100113359	CENPA	0.896298	NS
100134845	CKS1B	0.627392	0.456004
100216364	PSMD4	0.443041	NS
100313497	CHIR-AB-487	NS	-0.852053
100529062	CDK2	0.589561	NS
100538349	UBE2V1	NS	0.420083
100857214	TUBA4B	0.718536	NS
100857285	BLOC1S1	0.589171	NS
100857312	ONECUT1	1.08687	NS
100857342	NANOS1	NS	-0.674245
100857368	ZCCHC6	1.39283	1.27858
100857414	LOC100857414	0.644469	NS
100857430	ECE2	-0.713157	-0.764447
100857433	PLIN4	NS	-7.70671
100857443	OSBPL7	0.567137	NS
100857489	CDC6	0.652779	NS
100857533	ELMO3	NS	-1.05881
100857572	HTRA1	1.62358	1.0343
100857596	NDUFS2	0.435163	NS
100857686	LOC100857686	-1.08409	-1.41945
100857743	LRRC71	1.52431	1.12515
100857756	SC5D	0.652964	NS
100857767	FOXO6	0.996876	0.607627
100857858	LOC100857858	0.505928	NS
100857885	KIAA1549	-0.477681	NS
100857958	PBXIP1	0.643719	NS
100858130	CBARP	0.636263	NS
100858223	THEM4	0.694108	NS
100858319	HIST1H4I	NS	1.03396
100858383	PFDN2	0.391797	NS
100858402	MRPL9	0.534399	NS
100858460	LOC100858460	NS	-1.37387
100858555	MFAP2	-0.857437	-0.910964
100858589	WDR55	NS	-0.638692
100858592	SORT1	0.719531	NS
100858652	FOXP4L	-0.440109	-0.664626
100858704	ECM1	0.692088	NS
100858730	CRLF1	0.889586	0.654646
100858737	LOC100858737	0.532516	NS
100858796	LOC100858796	NS	-0.823969
100858838	PIM1	NS	-0.729199
100858879	TTYH2	-0.566506	-0.779702
100858897	TCEA3	NS	-3.87157
100858984	LOC100858984	0.880813	NS
100858997	DIRAS1	-3.47812	NS
100858999	LOC100858999	1.13235	NS
100859108	STAMBPL1	NS	-0.904881
100859133	PTGES3	NS	0.338934
100859339	NPR2	-1.49969	-2.18644
100859347	LOC100859347	0.684105	NS
100859394	METTL23	0.811697	NS
100859413	UBE2C	0.525729	NS
100859441	CERS2L2	0.46257	NS
100859467	LOC100859467	2.17864	3.23145
100859497	ZNF606	NS	-0.585787
100859602	LOC100859602	4.04537	3.92623
100859610	CREB3L1	NS	0.663994
100859641	SDHC	0.547543	NS
100859645	LOC100859645	0.785855	0.904169
100859666	c2orf50	-4.52568	-4.69411
100859704	LOC100859704	1.37566	NS
100859737	LOC100859737	0.37953	NS
100859798	LOC100859798	NS	-1.88281
100859840	CYBA	0.53818	NS
100859879	VPS37D	NS	-2.90029
100873157	TGFB1	0.655529	NS
100996929	MYL6	0.579893	NS
101747384	LOC101747384	-0.515363	NS
101747660	LOC101747660	0.628972	NS
101747696	CRIP1	-2.32394	-2.30678
101747767	c15orf61	0.456241	NS
101747789	LOC101747789	0.538717	NS
101747823	LOC101747823	0.679233	NS
101748025	RPUSD3	0.498888	NS
101748332	CD164L2	1.11556	NS
101748749	ZNF469	1.24906	1.61428
101748854	LOC101748854	NS	-0.614067
101749060	LOC101749060	-1.2681	-0.780828
101749147	LOC101749147	-0.708454	NS
101749170	LOC101749170	1.10994	1.17294
101749223	LOC101749223	-0.625405	-0.519992
101749275	LOC101749275	-0.541201	NS
101749459	ARID5A	NS	-0.500717
101749469	LOC101749469	-0.518224	NS
101749629	VASN	0.399105	NS
101749632	CEP112	NS	0.472252
101749832	LOC101749832	1.33467	NS
101750333	LOC101750333	NS	-0.497283
101750428	LOC101750428	1.05553	NS
101750533	LOC101750533	NS	-0.579614
101750687	LOC101750687	1.1759	1.00882
101750765	LOC101750765	1.6771	1.62487
101750767	LOC101750767	NS	-1.63191
101750777	RASSF1	-0.449222	-1.14256
101750874	LOC101750874	0.439708	NS
101750894	LOC101750894	0.556562	NS
101750958	LOC101750958	0.767354	0.480585
101751390	LOC101751390	NS	-0.370463
101751402	PPP1R3G	0.863415	NS
101751586	SLC35E4	NS	-0.514112
101751742	LOC101751742	1.02978	1.07506
101751827	CDKN1C	0.555115	0.880201
101751866	LOC101751866	0.65143	0.84259
101751930	CCDC169	2.63174	2.13498
101752029	THBD	0.900521	0.472391
101752064	LOC101752064	-1.02402	NS
101752092	CLN5	-0.821791	NS
101752154	LOC101752154	0.593693	NS
101752211	LOC101752211	1.93701	3.79609
107049011	LOC107049011	-0.374155	NS
107049034	C10H15orf39	-0.858759	-1.03717
107049123	ECM1	NS	0.676109
107049208	YIF1B	NS	-0.585948
107049279	LOC107049279	2.24232	2.0383
107049287	LOC107049287	2.54836	2.83455
107049292	LOC107049292	NS	3.22988
107049294	LOC107049294	2.73625	3.20584
107049353	LOC107049353	0.899651	NS
107049368	LOC107049368	-1.09499	NS
107049468	LOC107049468	NS	-0.407119
107049482	LOC107049482	2.62667	2.48593
107049485	LOC107049485	NS	-0.502114
107049494	WBP1	0.520685	NS
107051792	LOC107051792	-0.656603	NS
107051855	LOC107051855	1.36831	1.10513
107051859	PTTG1IP	-0.632345	-0.739131
107051991	LOC107051991	NS	0.429455
107052004	LOC107052004	1.3594	1.70796
107052033	LOC107052033	0.983081	0.730001
107052318	LOC107052318	1.46678	NS
107052408	LOC107052408	6.08681	NS
107052460	TAF10	0.50277	NS
107052480	LOC107052480	NS	0.344547
107052535	LOC107052535	8.3296	5.38485
107052536	LOC107052536	8.5748	5.47265
107052673	LOC107052673	-1.49454	-0.795271
107052719	LOC107052719	NS	-0.366076
107052795	LOC107052795	1.52419	1.62194
107052797	PHLDA1	-0.655186	-0.596624
107052833	LOC107052833	2.50464	NS
107052884	LOC107052884	NS	1.50561
107053066	LOC107053066	NS	-1.28533
107053315	LOC107053315	-1.38142	-1.18463
107053338	tmem132a	0.453748	NS
107053353	LOC107053353	-0.899428	-1.15264
107053356	Inafm2	0.493897	NS
107053448	LOC107053448	-5.13947	-4.5025
107053634	ADO	NS	-0.421997
107053716	LOC107053716	-4.05765	NS
107053870	LOC107053870	-0.516198	NS
107053874	LOC107053874	1.04639	1.09362
107053928	LOC107053928	-1.45522	-1.28221
107054034	LOC107054034	1.05569	0.999592
107054048	LOC107054048	0.515903	0.509754
107054196	MEX3B	0.66818	0.383758
107054402	LOC107054402	NS	-0.952306
107054536	LOC107054536	-1.20432	NS
107054547	LOC107054547	1.03984	NS
107054745	UBALD2	NS	-0.618091
107054889	LOC107054889	NS	0.642658
107054985	ADD2	1.1403	NS
107055072	LOC107055072	0.845838	NS
107055138	HAX1	0.611418	NS
107055156	PSRC1	0.878282	NS
107055314	TNS4	0.769575	NS
107055339	LOC107055339	1.26747	1.21058
107055367	ISYNA1	0.46508	NS
107055391	MED29	0.480871	NS
107055416	COPZ1	0.451379	NS
107055521	LOC107055521	-0.520152	-0.796622
107055871	LOC107055871	NS	1.5463
107056127	LOC107056127	NS	0.694957
107056413	LOC107056413	0.875774	NS
107056630	LOC107056630	0.714442	NS
107056777	LOC107056777	-1.04927	-0.611768
107057370	SEMA4C	0.766247	NS
107057573	LOC107057573	0.827607	NS
107057642	VASP	0.778424	NS
